# Supplementary material
Source: publisher site journal article supplement (https://www.dovepress.com/article/460103)
Supplement: Supplementary file 1 [file get_supplementary_file.php]

**The clinical association between the inflammation-nutritional condition and prognosis of locally advanced intrahepatic cholangiocarcinoma after R0 resection: evidence from competing risk and propensity matching analysis**

| **Supplementary Table 1.** The definitions for SII, AISI, SIRI, GPR, PNI, and ALI | |
| --- | --- |
| Indices | Elements/Formula |
| SII[1] | (Neutrophil count × platelet count)/lymphocyte count |
| AISI[2] | (Neutrophil count × monocyte count × platelet count)/lymphocyte count |
| SIRI[2] | (Neutrophil count × monocyte count)/lymphocyte count |
| GPR[3] | γ-glutamyl transferase / platelet count |
| PNI[4] | Lymphocyte count (10^9/L) × 5 + serum albumin concentration |
| ALI[5] | serum albumin concentration × weight/(height)2 × Neutrophil count/lymphocyte count |
| SII, systemic immune- inflammation index; AISI, aggregate systemic inflammation index; SIRI, systemic inflammation response index; GPR, gamma-glutamyl-transpeptidase to platelet ratio; PNI, prognostic nutrition index; ALI, advanced lung cancer index. | |

**REFERENCES**

1. Hu B, Yang XR, Xu Y, et al. Systemic immune-inflammation index predicts prognosis of patients after curative resection for hepatocellular carcinoma. Clin Cancer Res. 2014 Dec 1;20(23):6212-22.
2. Li X, Wang L, Liu M, Zhou H, Xu H. Association between neutrophil-to-lymphocyte ratio and diabetic kidney disease in type 2 diabetes mellitus patients: a cross-sectional study. Front Endocrinol (Lausanne). 2024 Jan 4;14:1285509.
3. Ma C, Wang N, Ma H, et al. Serum gamma-glutamyl transpeptidase-to-platelet ratio (GPR) can predict the prognosis of hepatocellular carcinoma: a meta-analysis and systematic review. Transl Cancer Res. 2022 Apr;11(4):745-753.
4. Sun K, Chen S, Xu J, et al. The prognostic significance of the prognostic nutritional index in cancer: a systematic review and meta-analysis. J Cancer Res Clin Oncol 2014;140:1537-49. 10.1007/s00432-014-1714-3
5. Jafri SH, Shi R, Mills G. Advance lung cancer inflammation index (ALI) at diagnosis is a prognostic marker in patients with metastatic non-small cell lung cancer (NSCLC): a retrospective review. BMC Cancer. 2013 Mar 27;13:158.

**
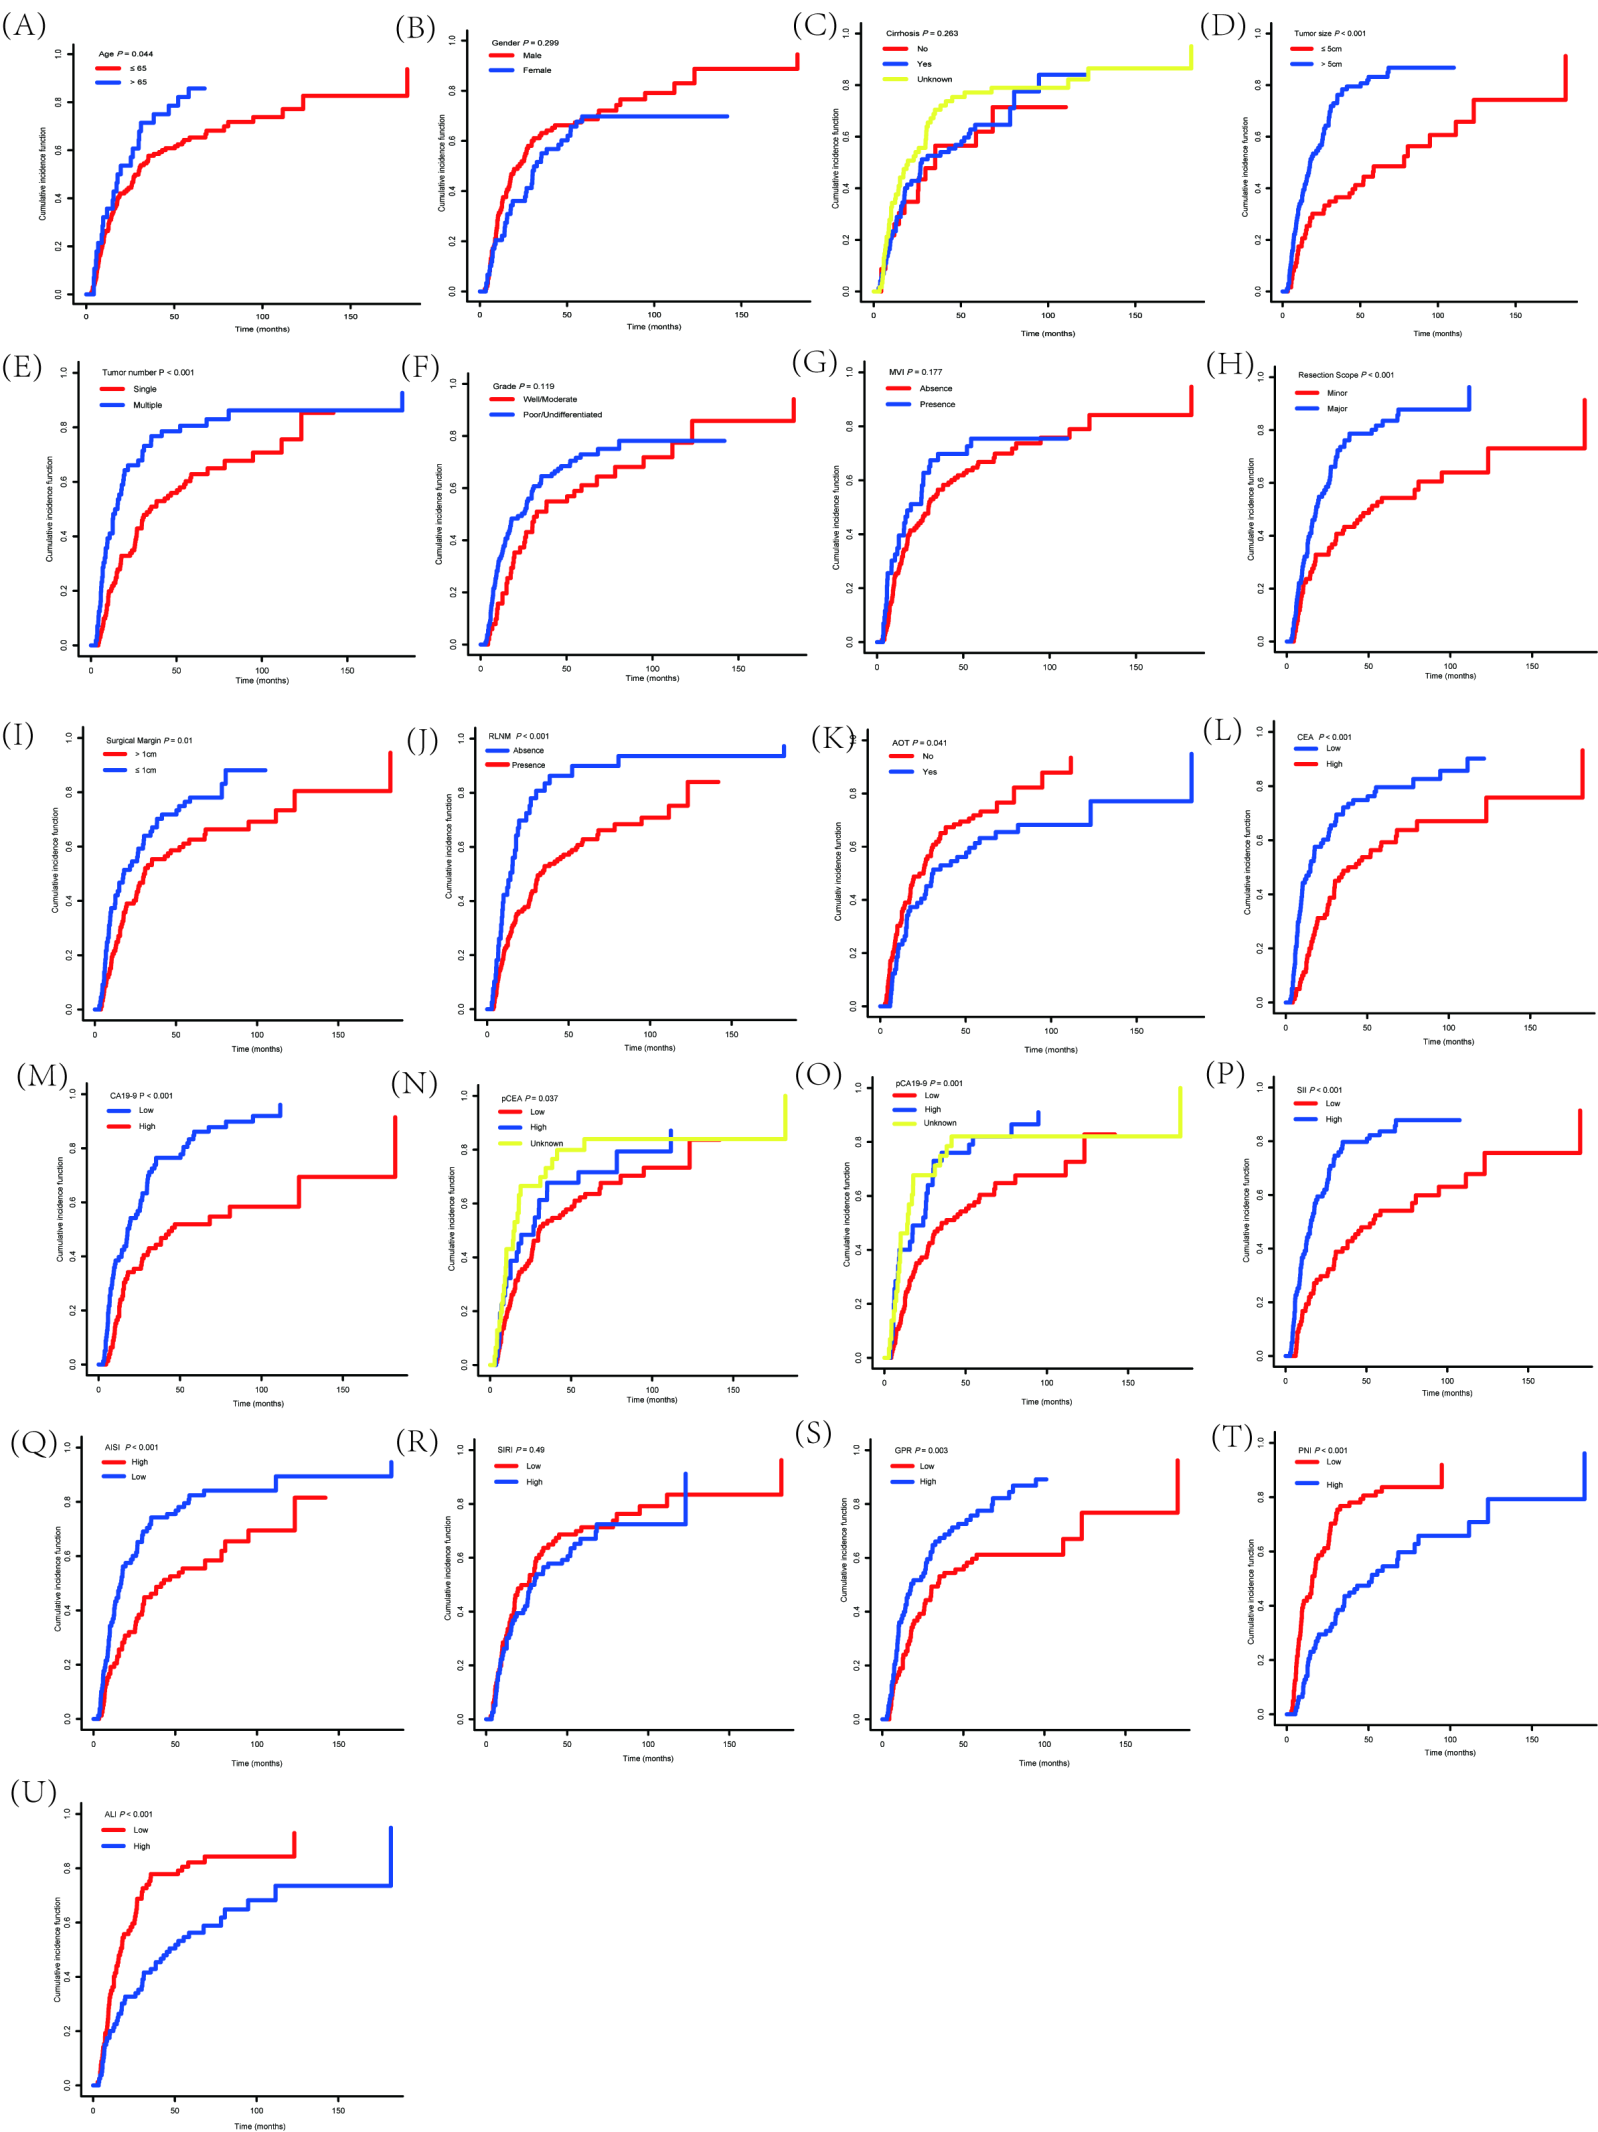
**

**Supplementary Figure 1.** Plots of univariate Fine-Gray analysis of overall survival for locally advanced intraheptic cholangiocarcinoma after R0 resection. A) for age, B) for gender, C) for liver cirrhosis, D) for tumor size, E) for tumor number, F) for pathological grade, G) for MVI, H) for resection scope, I) for surgical margin, J) for RLNM, K) for AOT, L) for CEA, M) for CA19-9, N) for pCEA, O) for p CA19-9, P) for SII,Q) for AISI, R) for SIRI, S) for GPR, T) for PNI, U) for ALI. MVI, microvascular invasion; RLNM, regional lymph node metastasis; AOT, adjuvant postoperative treatment; CEA, carcino-embryonic antigen; CA19-9, carbohydrate antigen 19-9; pCEA, postoperative CEA; pCA19-9, postoperative CA19-9; SII, systemic immune- inflammation index; AISI, aggregate systemici nflammation index; SIRI, systemic inflammation response index; GPR, gamma-glutamyl-transpeptidase to platelet ratio; PNI, prognostic nutrition index; ALI, advanced lung cancer index.


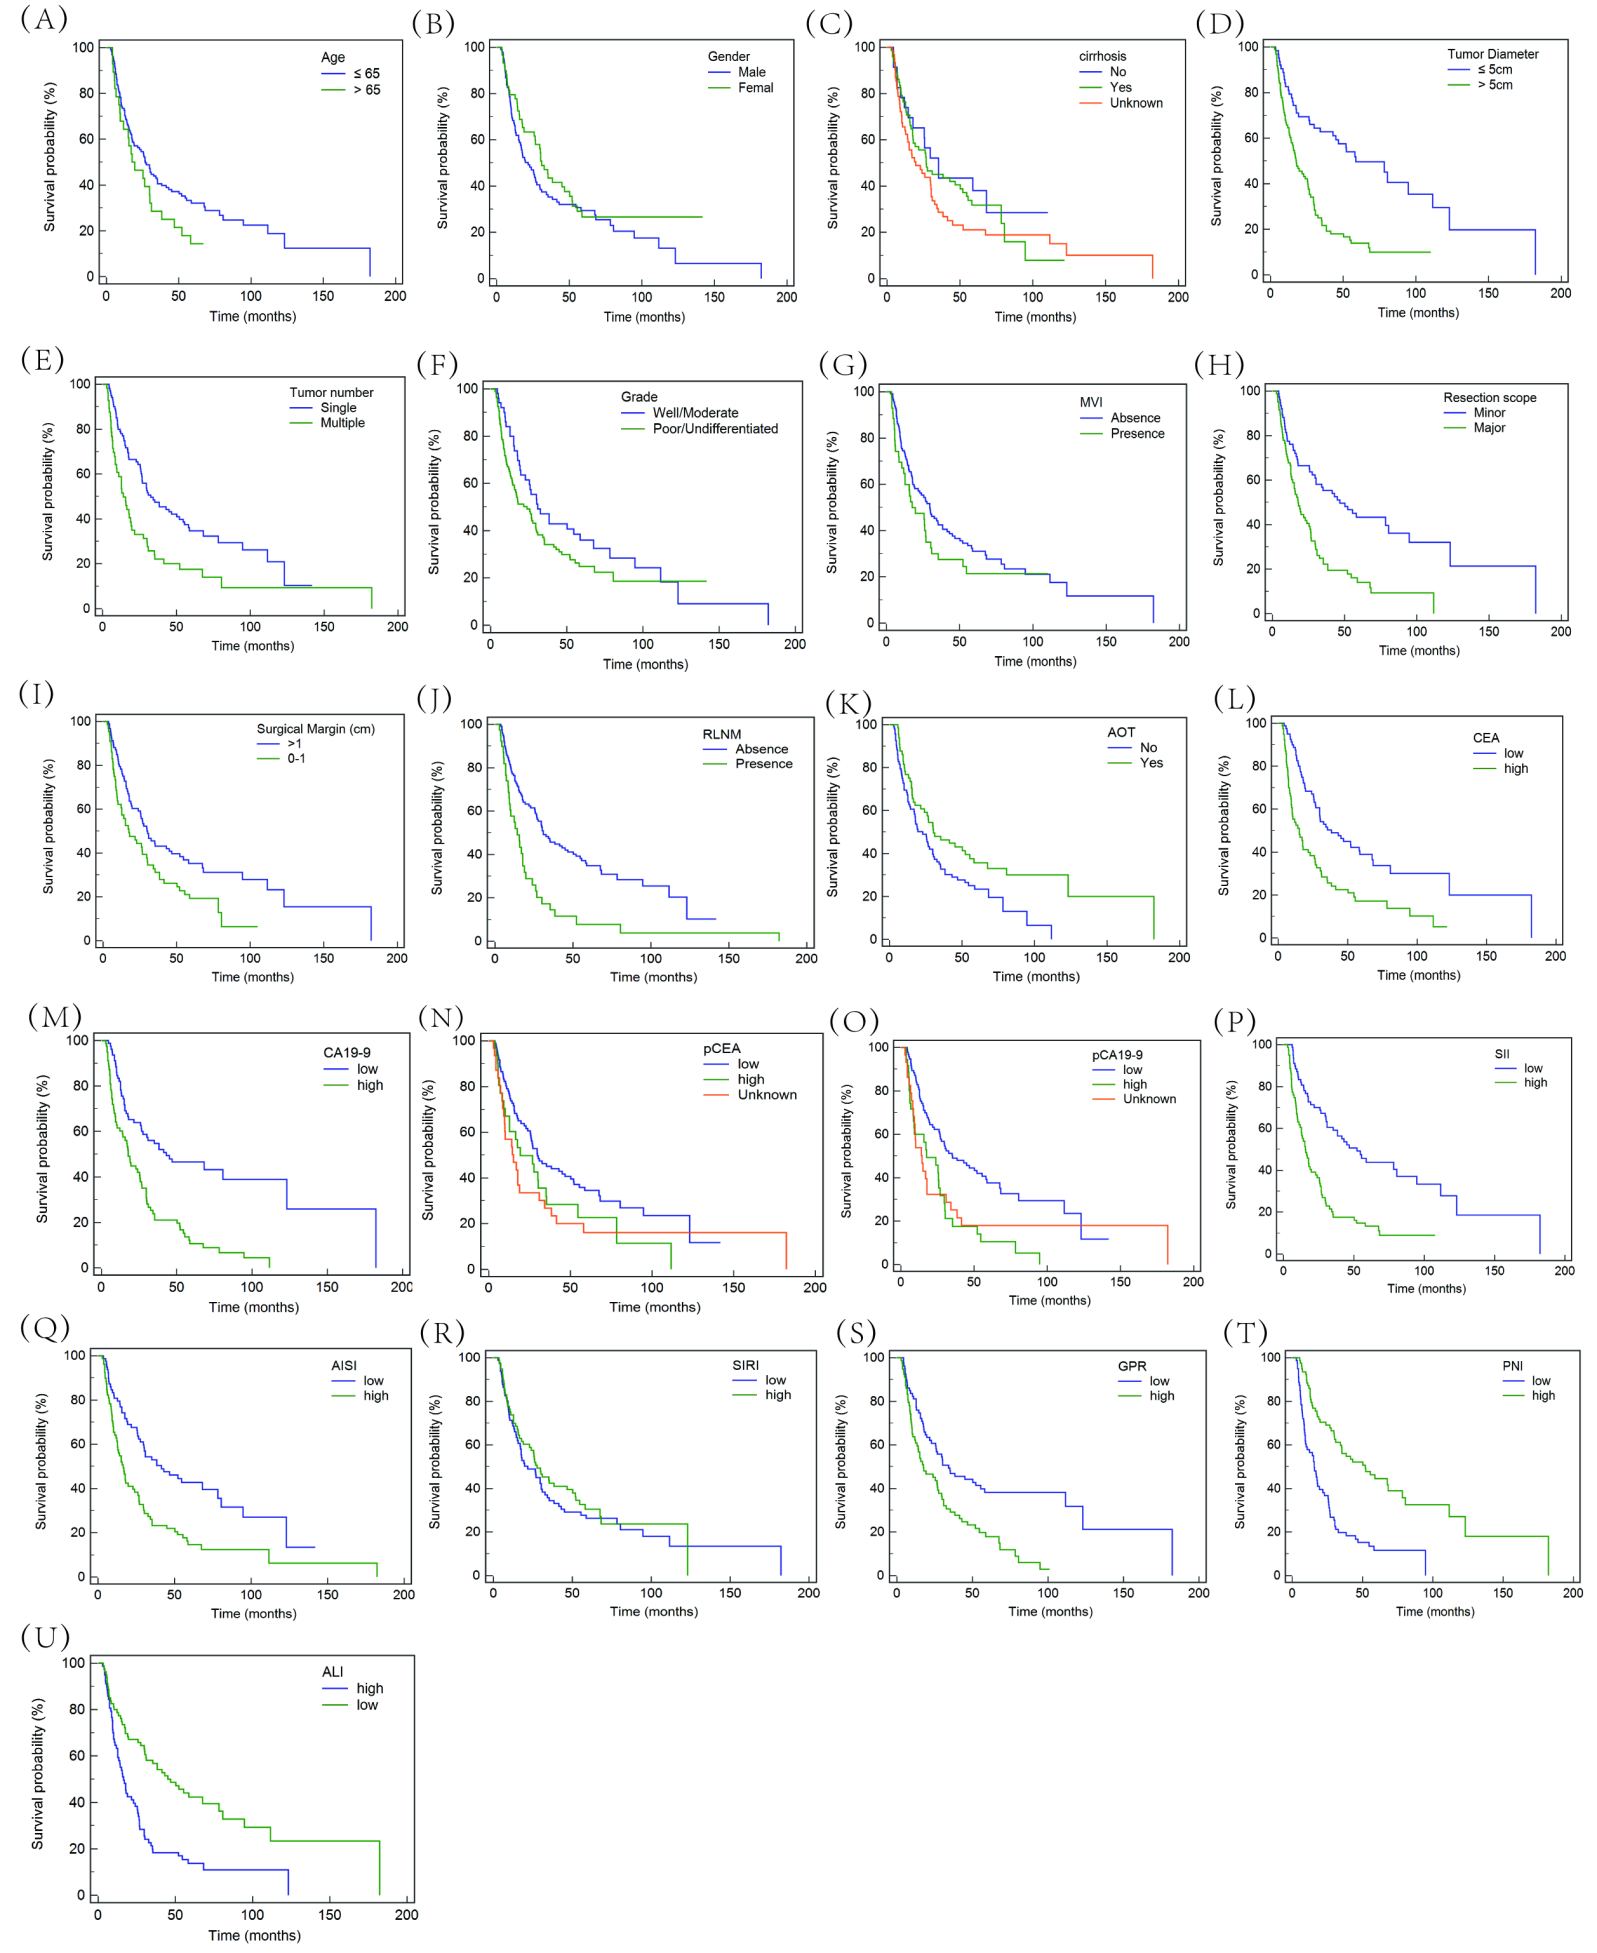


**Supplementary Figure 2.** Plots of Kaplan-Meier survival analysis of overall survival for locally advanced intraheptic cholangiocarcinoma after R0 resection. A) for age, B) for gender, C) for liver cirrhosis, D) for tumor size, E) for tumor number, F) for pathological grade, G) for MVI, H) for resection scope, I) for surgical margin, J) for RLNM, K) for AOT, L) for CEA, M) for CA19-9, N) for pCEA, O) for p CA19-9, P) for SII,Q) for AISI, R) for SIRI, S) for GPR, T) for PNI, U) for ALI. MVI, microvascular invasion; RLNM, regional lymph node metastasis; AOT, adjuvant postoperative treatment; CEA, carcino-embryonic antigen; CA19-9, carbohydrate antigen 19-9; pCEA, postoperative CEA; pCA19-9, postoperative CA19-9; SII, systemic immune- inflammation index; AISI, aggregate systemici nflammation index; SIRI, systemic inflammation response index; GPR, gamma-glutamyl-transpeptidase to platelet ratio; PNI, prognostic nutrition index; ALI, advanced lung cancer index.
